# Supplementary material for: Interaction of bisbenzimidazole-substituted carbazole derivatives with G-quadruplexes and living cells
Source: Royal Society of Chemistry journal article supplement (doi:10.1039/c5ra11543d), 2015-01-01

## Supporting information

### Interaction of bisbenzimidazole-substituted carbazole derivatives with G-quadruplexes and living cells

Yongbiao Wei<sup>a,b</sup>, Xin Zhang<sup>a</sup>, Linlin Wang<sup>a</sup>, Ying Liu<sup>a</sup>, Tao Bing<sup>a</sup>, Xiangjun Liu<sup>a</sup>, Dihua Shangguan<sup>\*a</sup>

<sup>a</sup> Beijing National Laboratory for Molecular Sciences, Key Laboratory of Analytical Chemistry for Living Biosystems, Institute of Chemistry, Chinese Academy of Sciences, Beijing, 100190, china

<sup>b</sup> Department of Pharmaceutical Chemistry, School of Pharmaceutical Sciences, Guangxi Medical University, No. 22, Shuangyong Road, Nanning 530021, Guangxi, PR China

#### List of contents:

1. Absorption and Fluorescence Spectra of 7b and 7c
2. Fluorometric titration of 7a-7c
3. CD spectra
4. Confocal images
5. NMR spectra and MS of compounds

## 1. Absorption and Fluorescence Spectra of 7a, 7c

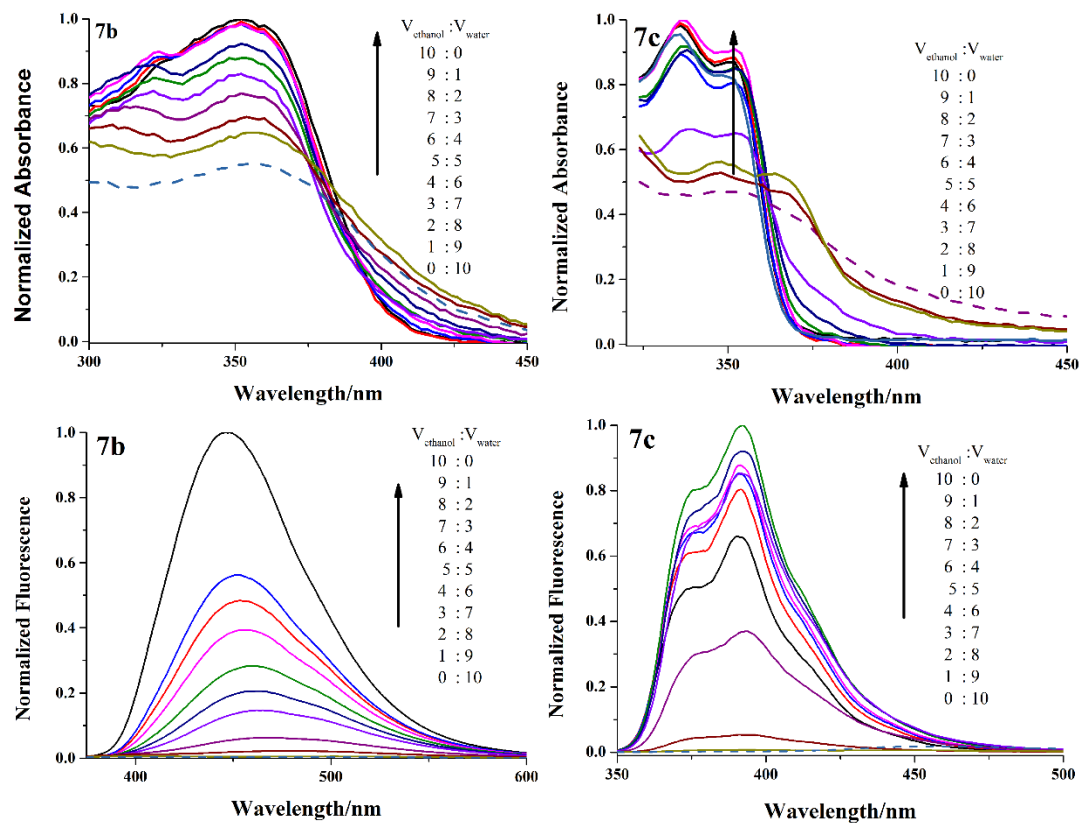

**Figure S1.** Absorption (a) and fluorescence spectra (b) of **7b** and **7c** (10  $\mu$ M) in mixed solvent of ethanol and water, excitation at 350 nm.

## 2. Fluorometric titration

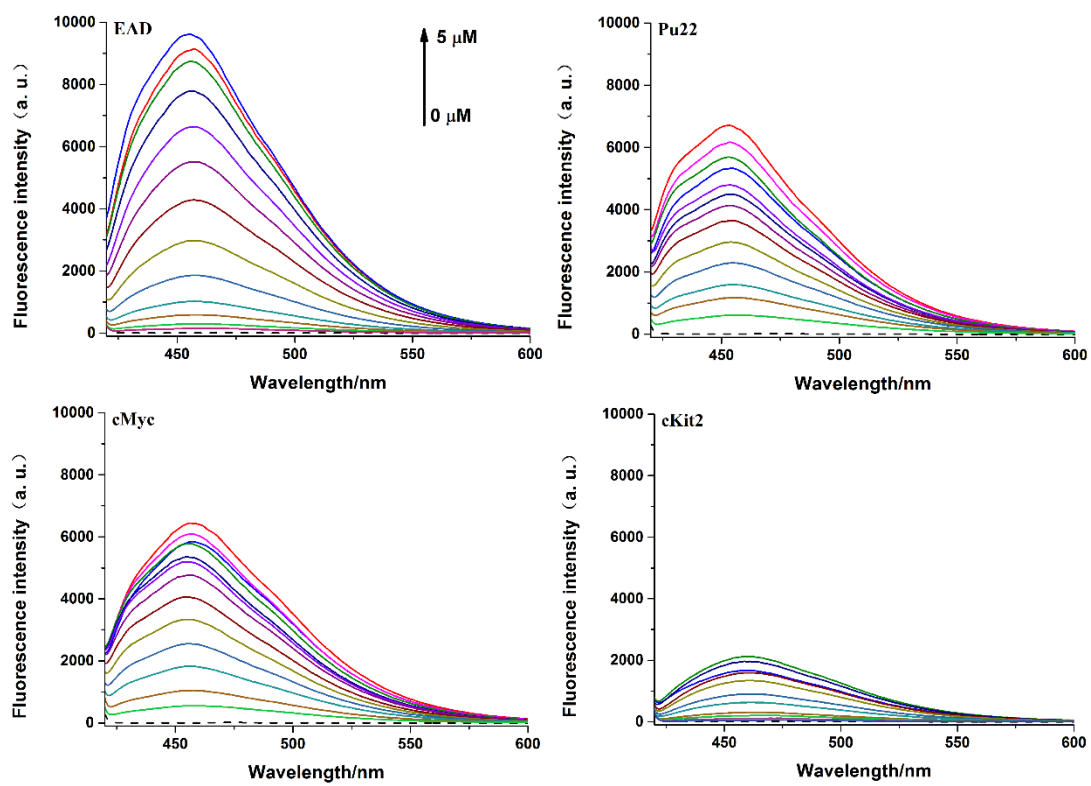

**Figure S2.** Fluorometric titration spectra of **7a** (1 μM) with different DNA ( $\lambda_{\text{ex}} = 408$  nm).

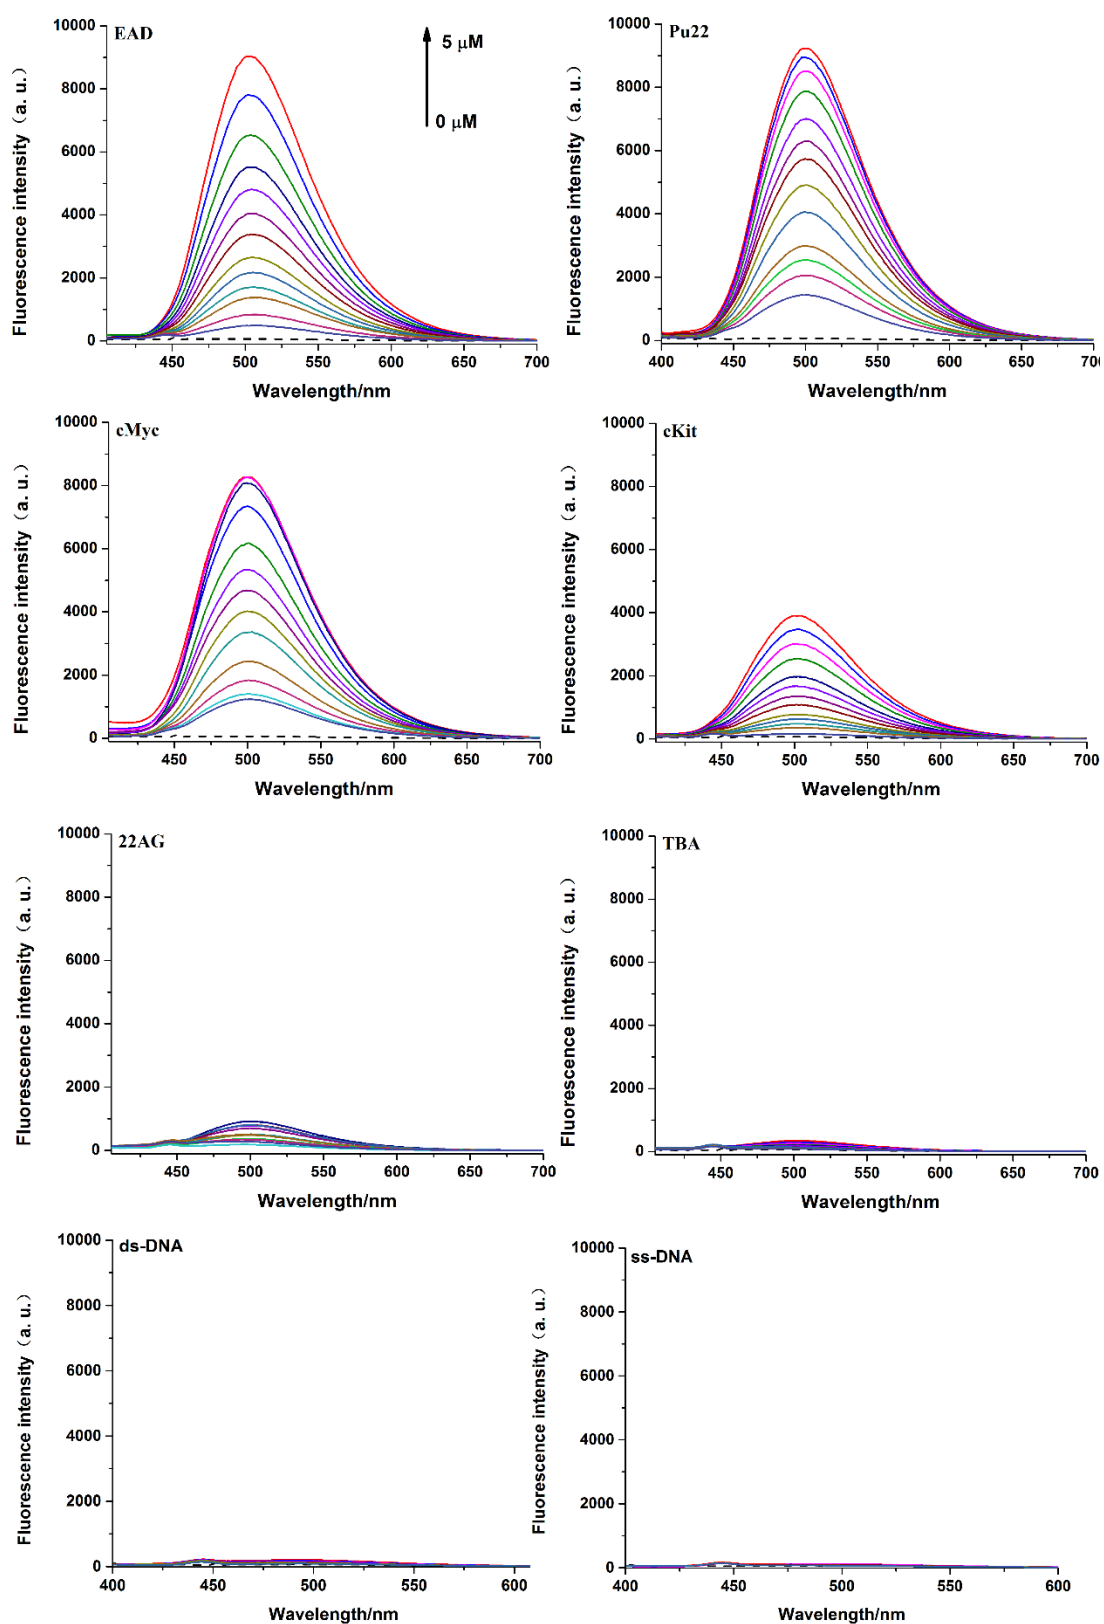

**Figure S3.** Fluorometric titration spectra of **7b** (1  $\mu\text{M}$ ) with different DNA ( $\lambda_{\text{ex}} = 385 \text{ nm}$ ).

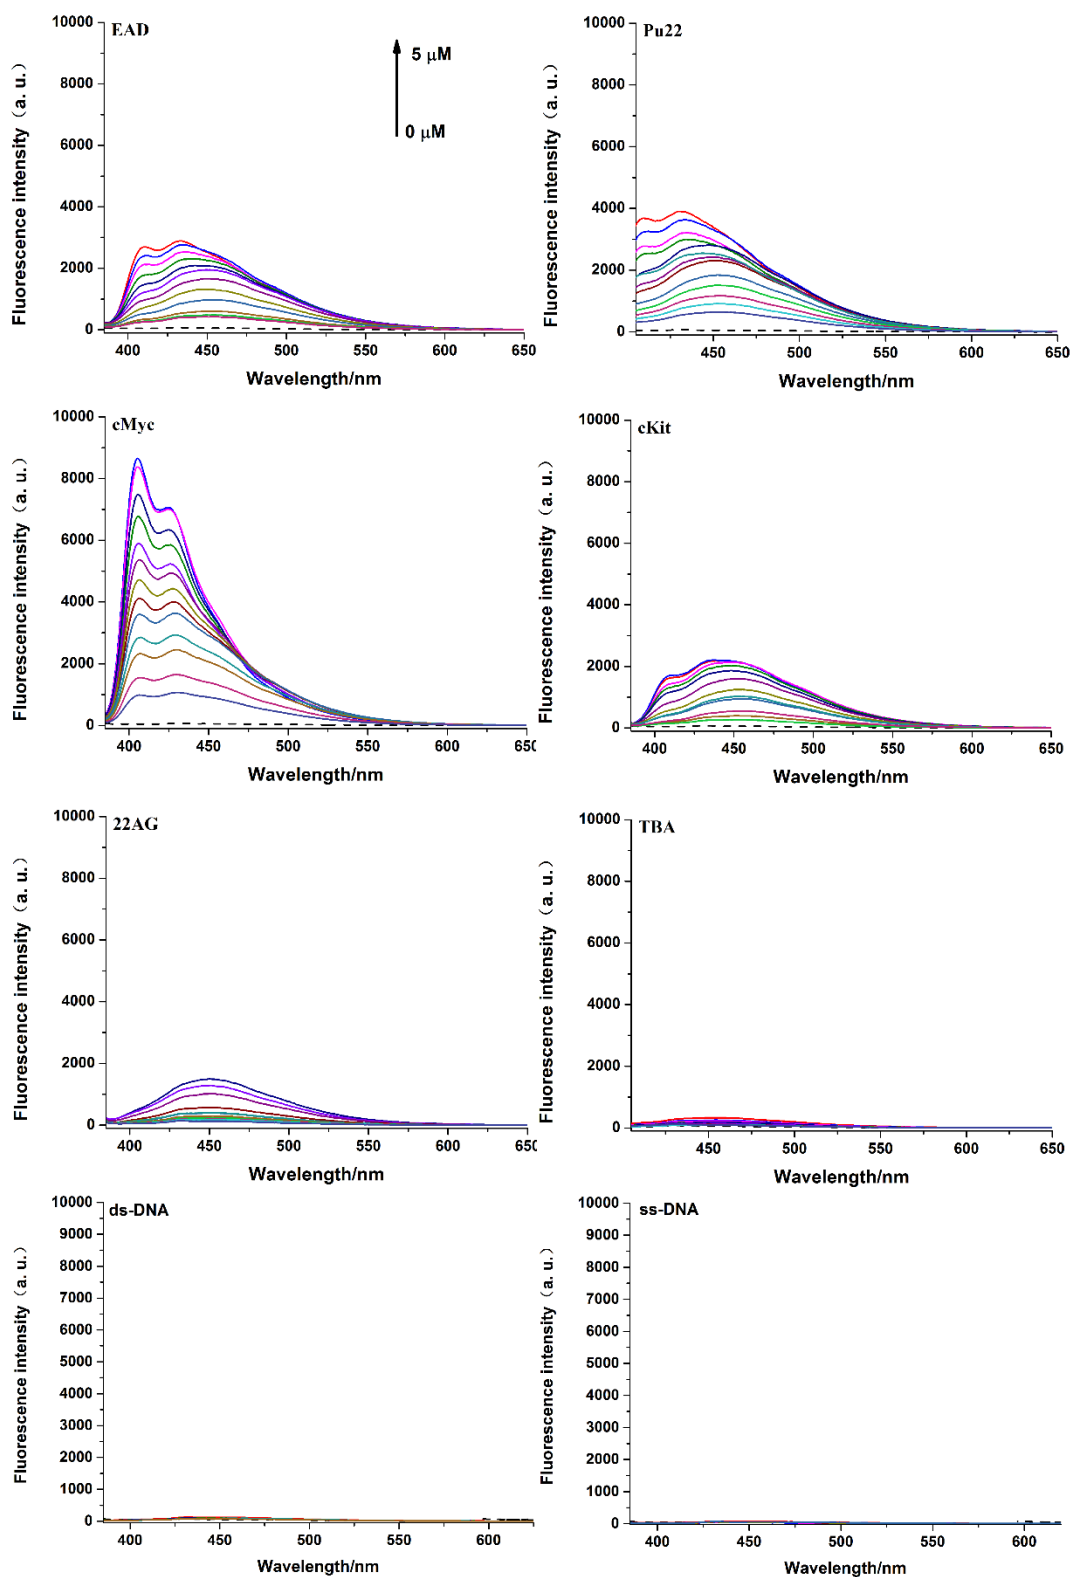

**Figure S4.** Fluorometric titration spectra of **7c** (1  $\mu\text{M}$ ) with different DNA ( $\lambda_{\text{exc}} = 375 \text{ nm}$ ).

#### 4. CD experiment

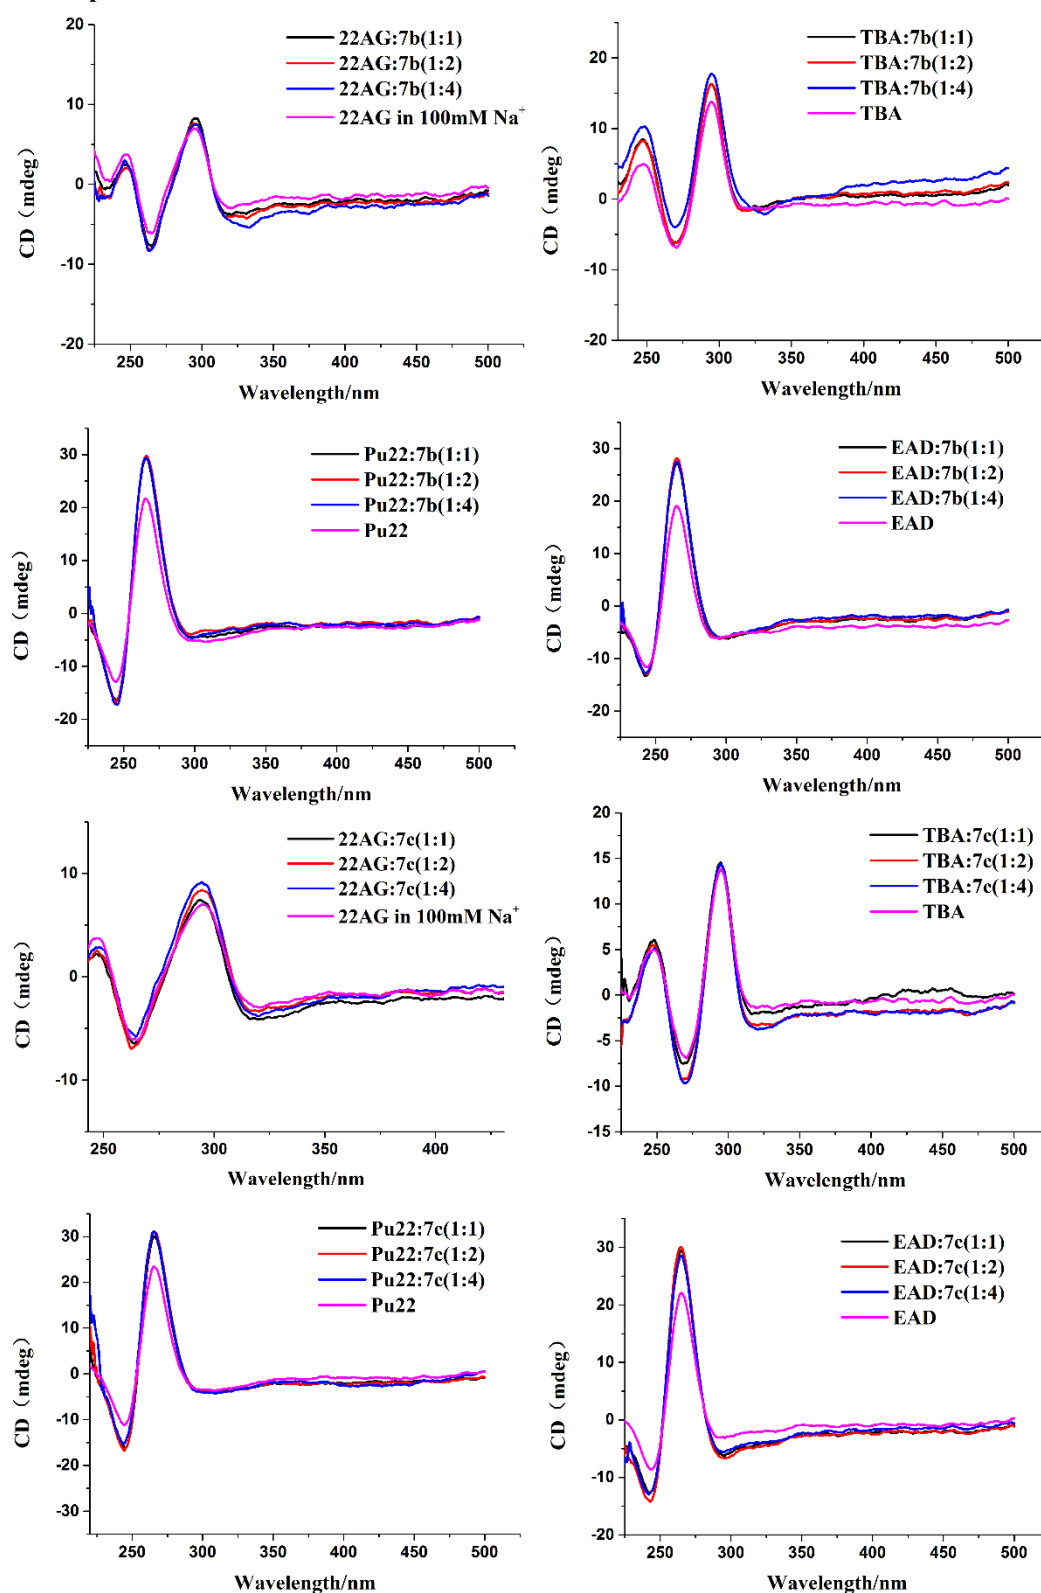

**Figure S5.** CD spectra of different G4s (4  $\mu$ M) (EAD, Pu22, TBA, 22AG) in the absence and presence of 7b and 7c.

## 5. Confocal images

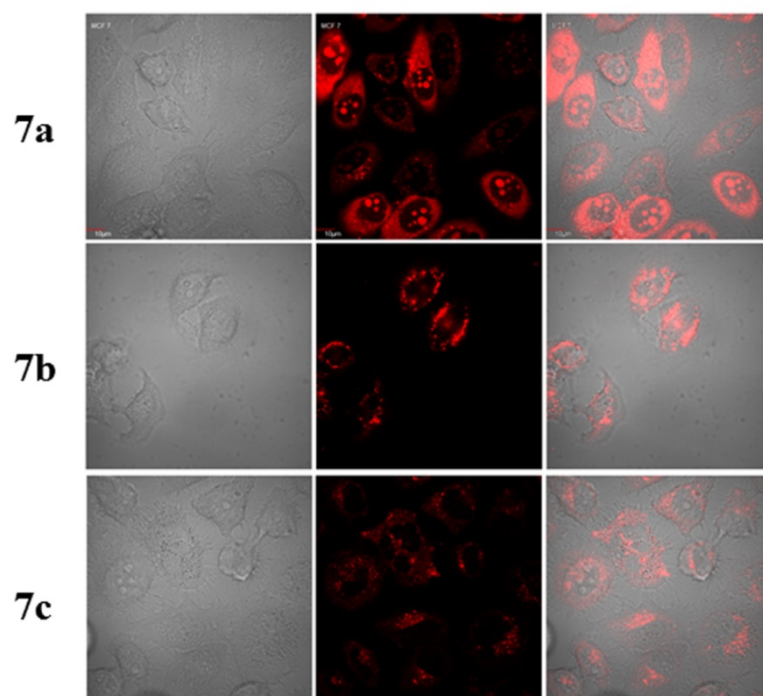

**Figure S6.** Confocal images of MCF-7 cells stained by **7a**, **7b** and **7c** (10 $\mu$ M).

6. <sup>1</sup>H NMR spectra and MS of compounds

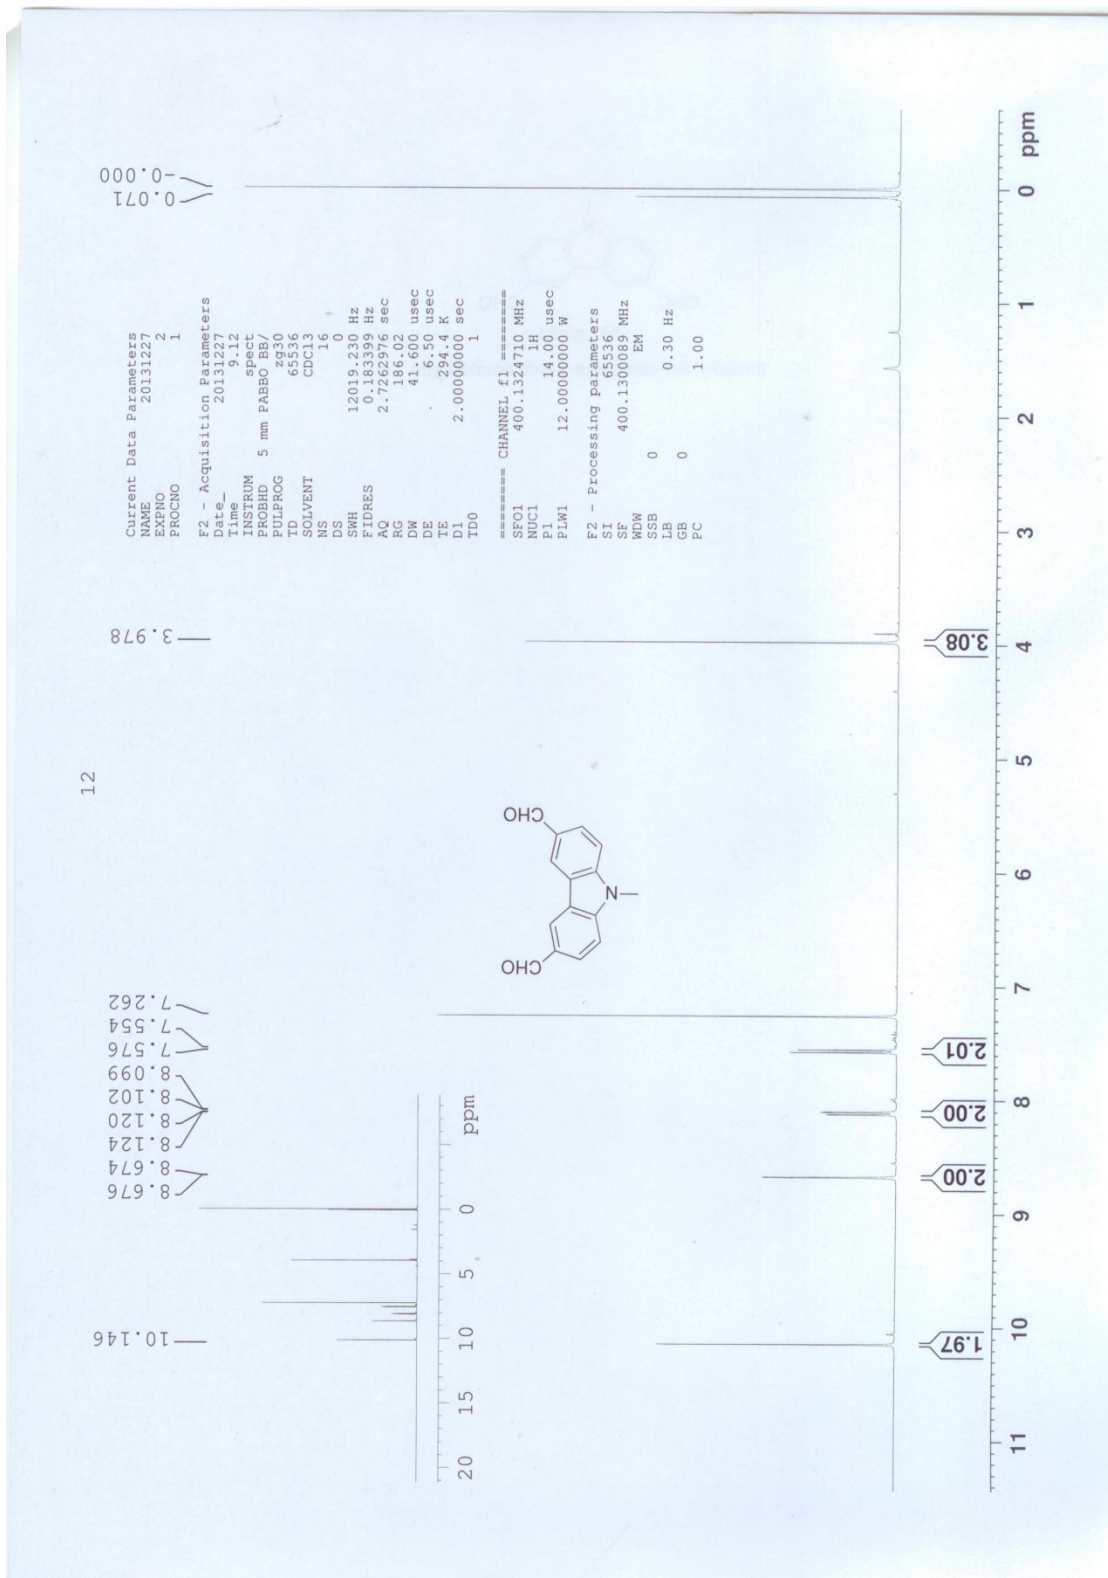



D:\DATA\2014\201403\20140325\201403252810\_12411

printed: 3/25/2014 3:37:03 PM

# MALDI-TOF, CCA, 4, 20140325

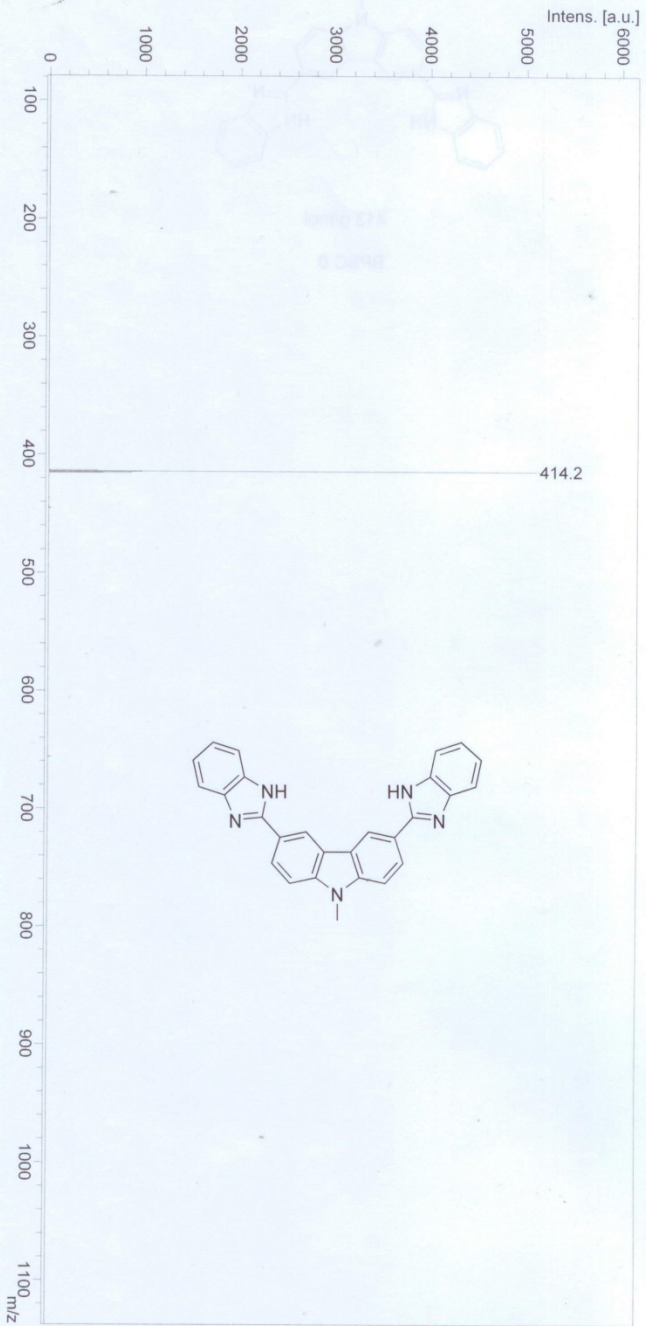

# ESI(P),AO,20140916

## Analysis Info

Analysis Name D:\Data\ESI\2014\2014-09\0916\AO\_000001.d  
Method 4\_23\_Sensitivity\_4,7T  
Sample Name AO  
Comment

Acquisition Date 9/16/2014 11:36:09 AM

Operator  
Instrument solariX

## Acquisition Parameter

|                     |            |                       |           |                       |                          |
|---------------------|------------|-----------------------|-----------|-----------------------|--------------------------|
| Acquisition Mode    | Single MS  | Acquired Scans        | 8         | Calibration Date      | Mon Sep 15 08:57:39      |
| Polarity            | Positive   | No. of Cell Fills     | 1         | Data Acquisition Size | 2048576                  |
| Broadband Low Mass  | 57.8 m/z   | Source Accumulation   | 0.001 sec | Data Processing Size  | 2097152                  |
| Broadband High Mass | 1000.0 m/z | Ion Accumulation Time | 0.050 sec | Apodization           | Sine-Bell Multiplication |

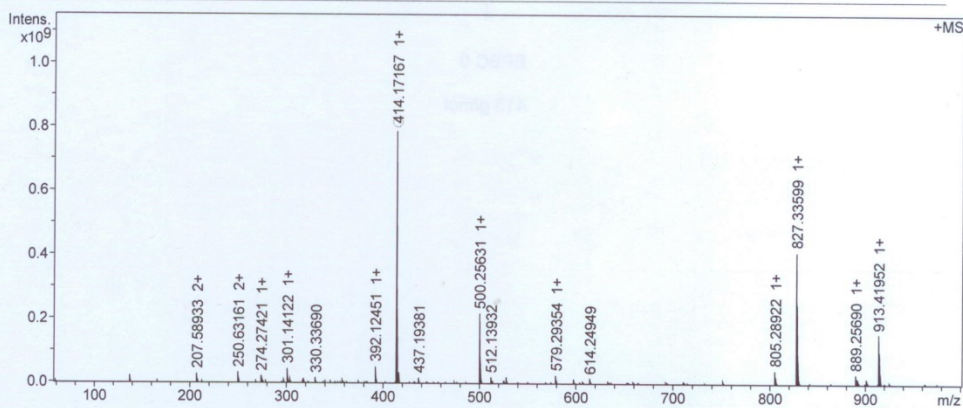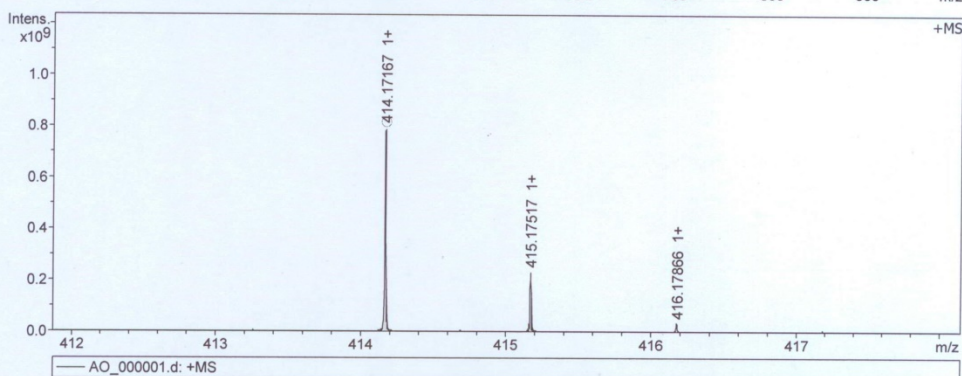

| Meas. m/z  | # | Ion Formula                                    | Score  | m/z        | err [ppm] | Mean err [ppm] | mSigma | rdb  | e <sup>-</sup> Conf | N-Rule |
|------------|---|------------------------------------------------|--------|------------|-----------|----------------|--------|------|---------------------|--------|
| 414.171671 | 1 | C <sub>27</sub> H <sub>20</sub> N <sub>5</sub> | 100.00 | 414.171322 | -0.8      | -1.2           | 10.4   | 20.5 | even                | ok     |

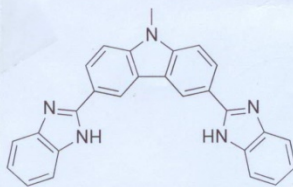



# MALDI-TOF, CCA, 20, 20140410

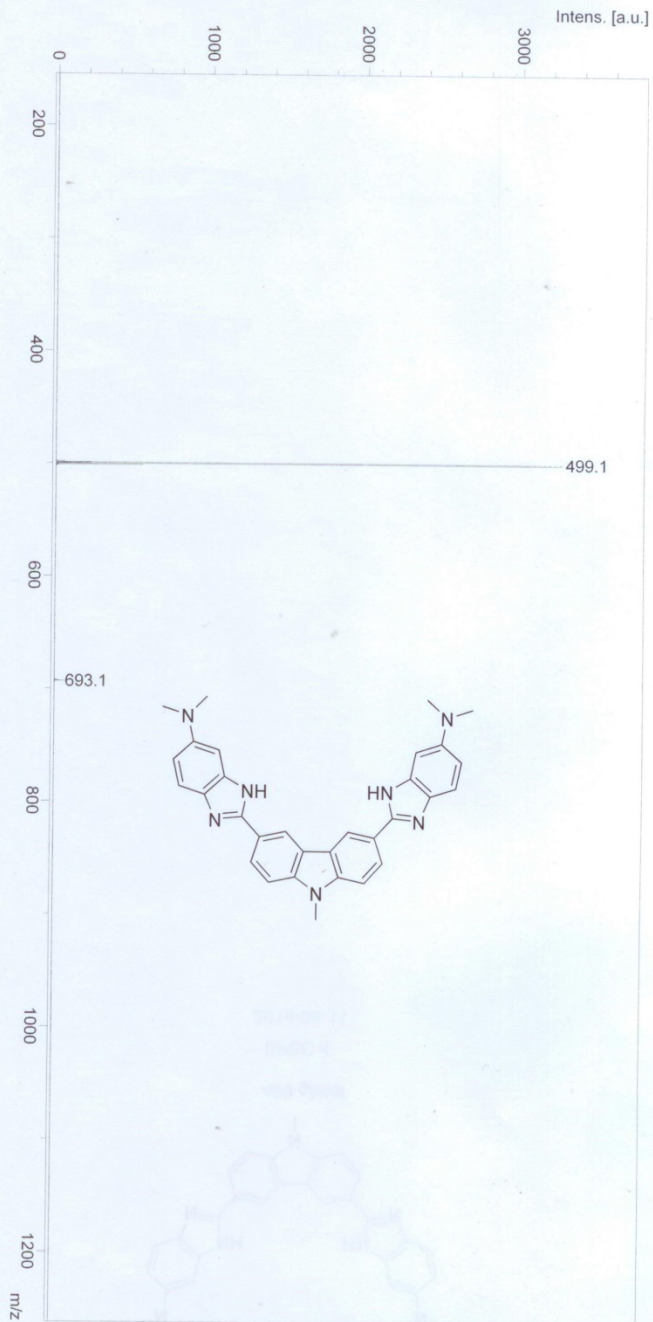

# ESI(P),D4,20140916

## Analysis Info

Analysis Name D:\Data\ESI\2014\2014-09\0916\D4\_000004.d  
 Method 4\_23\_Sensitivity\_4,7T  
 Sample Name D4  
 Comment

Acquisition Date 9/16/2014 11:12:39 AM

Operator  
 Instrument solarIX

## Acquisition Parameter

|                     |            |                       |           |                       |                          |
|---------------------|------------|-----------------------|-----------|-----------------------|--------------------------|
| Acquisition Mode    | Single MS  | Acquired Scans        | 8         | Calibration Date      | Mon Sep 15 08:57:39      |
| Polarity            | Positive   | No. of Cell Fills     | 1         | Data Acquisition Size | 2048576                  |
| Broadband Low Mass  | 57.8 m/z   | Source Accumulation   | 0.001 sec | Data Processing Size  | 2097152                  |
| Broadband High Mass | 1000.0 m/z | Ion Accumulation Time | 0.001 sec | Apodization           | Sine-Bell Multiplication |

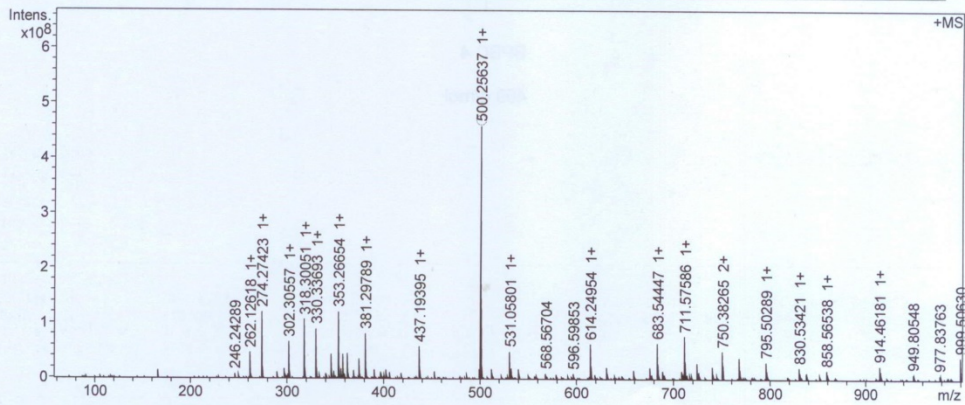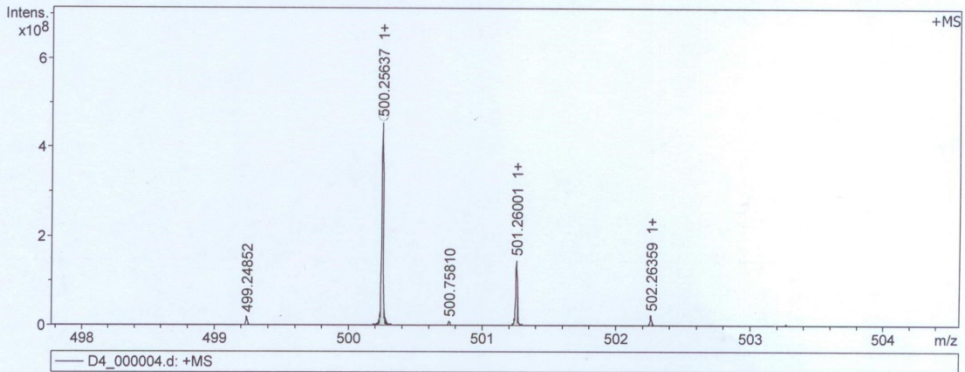

| Meas. m/z  | # | Ion Formula | Score  | m/z        | err [ppm] | Mean err [ppm] | mSigma | rdb  | e <sup>-</sup> Conf | N-Rule |
|------------|---|-------------|--------|------------|-----------|----------------|--------|------|---------------------|--------|
| 500.256365 | 1 | C31H30N7    | 100.00 | 500.255720 | -1.3      | -1.7           | 22.5   | 20.5 | even                | ok     |
|            | 2 | C33H32N4O   | 84.09  | 500.257063 | -1.4      | 1.1            | 28.8   | 20.0 | odd                 | ok     |

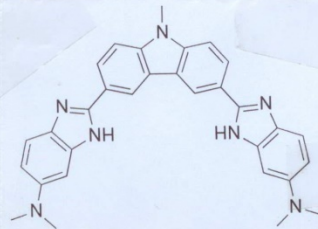

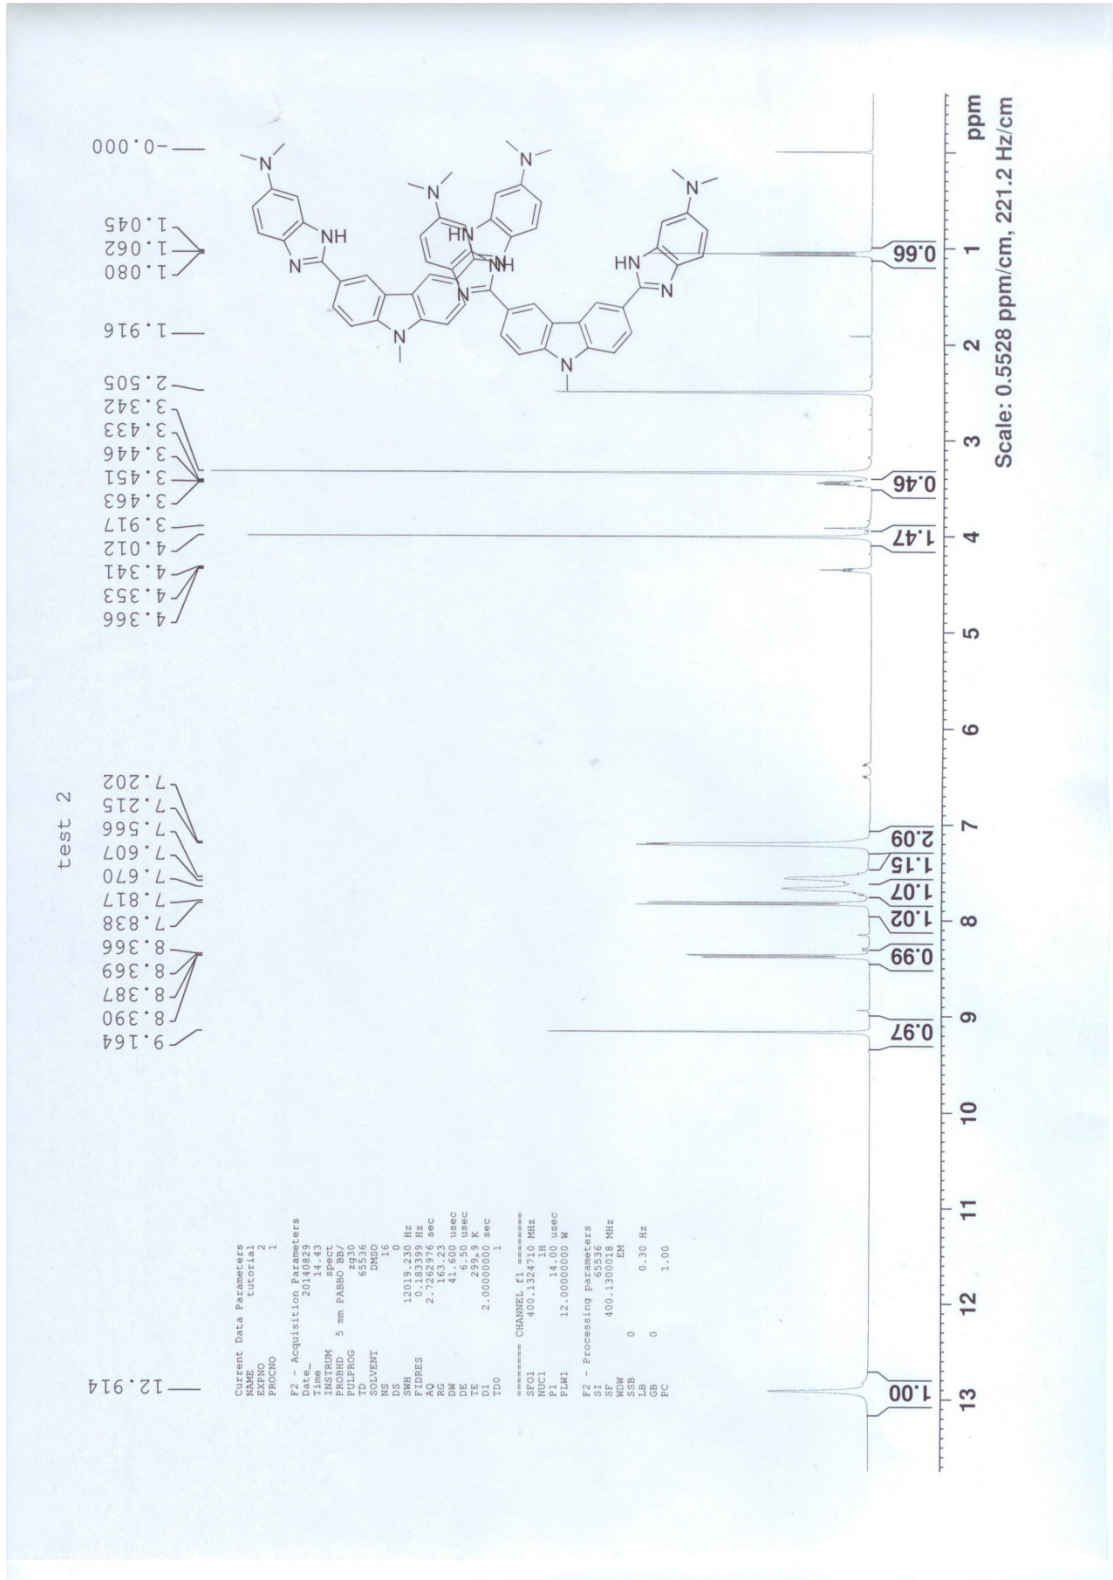

test 2

12.914  
 9.164  
 8.390  
 8.387  
 8.366  
 8.366  
 7.838  
 7.817  
 7.670  
 7.607  
 7.566  
 7.215  
 7.202

Current Data Parameters  
 NAME tutorial  
 EXPNO 2  
 PROCNO 1  
 F2 - Acquisition Parameters  
 Date\_ 20081114  
 Time 14.43  
 INSTRUM spect  
 PULPROG zgpg30  
 TD 65536  
 SOLVENT DMSO  
 DS 2  
 SWH 12019.220 Hz  
 FIDRES 0.343976 Hz  
 AQ 2.7282976 sec  
 RG 163.23  
 DW 41.600 usec  
 DE 1.900 usec  
 TE 299.9 K  
 D1 2.00000000 sec  
 TDO 1  
 ===== CHANNEL f1 =====  
 NUC1 13C  
 P1 14.00 usec  
 PL1 12.00000000 W  
 F2 - Processing parameters  
 SI 65536  
 SF 400.1300000 MHz  
 WDW EM  
 SSB 0  
 GB 0  
 PC 1.00

4.366  
 4.353  
 4.341  
 4.012  
 3.917  
 3.463  
 3.451  
 3.446  
 3.433  
 3.342  
 2.505  
 1.916  
 1.080  
 1.062  
 1.045

1.00  
 0.97  
 0.99  
 1.02  
 1.07  
 1.15  
 2.09  
 1.47  
 0.46  
 0.66  
 ppm

Scale: 0.5528 ppm/cm, 221.2 Hz/cm

d4

Current Data Parameters  
NAME WFD  
EXPNO 88  
PROCNO 1  
F2 - Acquisition Parameters  
Date\_ 20180225  
Time\_ 12:52:55  
INSTRUM spect  
PROBHD 5 mm PALBO BBI  
PULPROG zgpg30  
TD 65536  
SOLVENT DMSO  
DS 0  
SWH 12019.230 Hz  
FIDRES 0.35399 Hz  
AQ 2.782396 sec  
RG 111.64 sec  
DM 41.600 usec  
DE 2.000 usec  
TE 297.4 K  
D1 2.00000000 sec  
D0 1

\*\*\*\*\* CHANNEL f1 \*\*\*\*\*  
SFO1 400.1324710 MHz  
P1 14.00 usec  
PL1 12.00000000 W  
SFO2 400.1324710 MHz  
P2 14.00 usec  
PL2 12.00000000 W  
SFO3 400.1324710 MHz  
P3 14.00 usec  
PL3 12.00000000 W  
SFO4 400.1324710 MHz  
P4 14.00 usec  
PL4 12.00000000 W  
SFO5 400.1324710 MHz  
P5 14.00 usec  
PL5 12.00000000 W  
SFO6 400.1324710 MHz  
P6 14.00 usec  
PL6 12.00000000 W  
SFO7 400.1324710 MHz  
P7 14.00 usec  
PL7 12.00000000 W  
SFO8 400.1324710 MHz  
P8 14.00 usec  
PL8 12.00000000 W  
SFO9 400.1324710 MHz  
P9 14.00 usec  
PL9 12.00000000 W  
SFO10 400.1324710 MHz  
P10 14.00 usec  
PL10 12.00000000 W  
SFO11 400.1324710 MHz  
P11 14.00 usec  
PL11 12.00000000 W  
SFO12 400.1324710 MHz  
P12 14.00 usec  
PL12 12.00000000 W  
SFO13 400.1324710 MHz  
P13 14.00 usec  
PL13 12.00000000 W  
SFO14 400.1324710 MHz  
P14 14.00 usec  
PL14 12.00000000 W  
SFO15 400.1324710 MHz  
P15 14.00 usec  
PL15 12.00000000 W  
SFO16 400.1324710 MHz  
P16 14.00 usec  
PL16 12.00000000 W  
SFO17 400.1324710 MHz  
P17 14.00 usec  
PL17 12.00000000 W  
SFO18 400.1324710 MHz  
P18 14.00 usec  
PL18 12.00000000 W  
SFO19 400.1324710 MHz  
P19 14.00 usec  
PL19 12.00000000 W  
SFO20 400.1324710 MHz  
P20 14.00 usec  
PL20 12.00000000 W  
SFO21 400.1324710 MHz  
P21 14.00 usec  
PL21 12.00000000 W  
SFO22 400.1324710 MHz  
P22 14.00 usec  
PL22 12.00000000 W  
SFO23 400.1324710 MHz  
P23 14.00 usec  
PL23 12.00000000 W  
SFO24 400.1324710 MHz  
P24 14.00 usec  
PL24 12.00000000 W  
SFO25 400.1324710 MHz  
P25 14.00 usec  
PL25 12.00000000 W  
SFO26 400.1324710 MHz  
P26 14.00 usec  
PL26 12.00000000 W  
SFO27 400.1324710 MHz  
P27 14.00 usec  
PL27 12.00000000 W  
SFO28 400.1324710 MHz  
P28 14.00 usec  
PL28 12.00000000 W  
SFO29 400.1324710 MHz  
P29 14.00 usec  
PL29 12.00000000 W  
SFO30 400.1324710 MHz  
P30 14.00 usec  
PL30 12.00000000 W  
SFO31 400.1324710 MHz  
P31 14.00 usec  
PL31 12.00000000 W  
SFO32 400.1324710 MHz  
P32 14.00 usec  
PL32 12.00000000 W  
SFO33 400.1324710 MHz  
P33 14.00 usec  
PL33 12.00000000 W  
SFO34 400.1324710 MHz  
P34 14.00 usec  
PL34 12.00000000 W  
SFO35 400.1324710 MHz  
P35 14.00 usec  
PL35 12.00000000 W  
SFO36 400.1324710 MHz  
P36 14.00 usec  
PL36 12.00000000 W  
SFO37 400.1324710 MHz  
P37 14.00 usec  
PL37 12.00000000 W  
SFO38 400.1324710 MHz  
P38 14.00 usec  
PL38 12.00000000 W  
SFO39 400.1324710 MHz  
P39 14.00 usec  
PL39 12.00000000 W  
SFO40 400.1324710 MHz  
P40 14.00 usec  
PL40 12.00000000 W  
SFO41 400.1324710 MHz  
P41 14.00 usec  
PL41 12.00000000 W  
SFO42 400.1324710 MHz  
P42 14.00 usec  
PL42 12.00000000 W  
SFO43 400.1324710 MHz  
P43 14.00 usec  
PL43 12.00000000 W  
SFO44 400.1324710 MHz  
P44 14.00 usec  
PL44 12.00000000 W  
SFO45 400.1324710 MHz  
P45 14.00 usec  
PL45 12.00000000 W  
SFO46 400.1324710 MHz  
P46 14.00 usec  
PL46 12.00000000 W  
SFO47 400.1324710 MHz  
P47 14.00 usec  
PL47 12.00000000 W  
SFO48 400.1324710 MHz  
P48 14.00 usec  
PL48 12.00000000 W  
SFO49 400.1324710 MHz  
P49 14.00 usec  
PL49 12.00000000 W  
SFO50 400.1324710 MHz  
P50 14.00 usec  
PL50 12.00000000 W  
SFO51 400.1324710 MHz  
P51 14.00 usec  
PL51 12.00000000 W  
SFO52 400.1324710 MHz  
P52 14.00 usec  
PL52 12.00000000 W  
SFO53 400.1324710 MHz  
P53 14.00 usec  
PL53 12.00000000 W  
SFO54 400.1324710 MHz  
P54 14.00 usec  
PL54 12.00000000 W  
SFO55 400.1324710 MHz  
P55 14.00 usec  
PL55 12.00000000 W  
SFO56 400.1324710 MHz  
P56 14.00 usec  
PL56 12.00000000 W  
SFO57 400.1324710 MHz  
P57 14.00 usec  
PL57 12.00000000 W  
SFO58 400.1324710 MHz  
P58 14.00 usec  
PL58 12.00000000 W  
SFO59 400.1324710 MHz  
P59 14.00 usec  
PL59 12.00000000 W  
SFO60 400.1324710 MHz  
P60 14.00 usec  
PL60 12.00000000 W  
SFO61 400.1324710 MHz  
P61 14.00 usec  
PL61 12.00000000 W  
SFO62 400.1324710 MHz  
P62 14.00 usec  
PL62 12.00000000 W  
SFO63 400.1324710 MHz  
P63 14.00 usec  
PL63 12.00000000 W  
SFO64 400.1324710 MHz  
P64 14.00 usec  
PL64 12.00000000 W  
SFO65 400.1324710 MHz  
P65 14.00 usec  
PL65 12.00000000 W  
SFO66 400.1324710 MHz  
P66 14.00 usec  
PL66 12.00000000 W  
SFO67 400.1324710 MHz  
P67 14.00 usec  
PL67 12.00000000 W  
SFO68 400.1324710 MHz  
P68 14.00 usec  
PL68 12.00000000 W  
SFO69 400.1324710 MHz  
P69 14.00 usec  
PL69 12.00000000 W  
SFO70 400.1324710 MHz  
P70 14.00 usec  
PL70 12.00000000 W  
SFO71 400.1324710 MHz  
P71 14.00 usec  
PL71 12.00000000 W  
SFO72 400.1324710 MHz  
P72 14.00 usec  
PL72 12.00000000 W  
SFO73 400.1324710 MHz  
P73 14.00 usec  
PL73 12.00000000 W  
SFO74 400.1324710 MHz  
P74 14.00 usec  
PL74 12.00000000 W  
SFO75 400.1324710 MHz  
P75 14.00 usec  
PL75 12.00000000 W  
SFO76 400.1324710 MHz  
P76 14.00 usec  
PL76 12.00000000 W  
SFO77 400.1324710 MHz  
P77 14.00 usec  
PL77 12.00000000 W  
SFO78 400.1324710 MHz  
P78 14.00 usec  
PL78 12.00000000 W  
SFO79 400.1324710 MHz  
P79 14.00 usec  
PL79 12.00000000 W  
SFO80 400.1324710 MHz  
P80 14.00 usec  
PL80 12.00000000 W  
SFO81 400.1324710 MHz  
P81 14.00 usec  
PL81 12.00000000 W  
SFO82 400.1324710 MHz  
P82 14.00 usec  
PL82 12.00000000 W  
SFO83 400.1324710 MHz  
P83 14.00 usec  
PL83 12.00000000 W  
SFO84 400.1324710 MHz  
P84 14.00 usec  
PL84 12.00000000 W  
SFO85 400.1324710 MHz  
P85 14.00 usec  
PL85 12.00000000 W  
SFO86 400.1324710 MHz  
P86 14.00 usec  
PL86 12.00000000 W  
SFO87 400.1324710 MHz  
P87 14.00 usec  
PL87 12.00000000 W  
SFO88 400.1324710 MHz  
P88 14.00 usec  
PL88 12.00000000 W  
SFO89 400.1324710 MHz  
P89 14.00 usec  
PL89 12.00000000 W  
SFO90 400.1324710 MHz  
P90 14.00 usec  
PL90 12.00000000 W  
SFO91 400.1324710 MHz  
P91 14.00 usec  
PL91 12.00000000 W  
SFO92 400.1324710 MHz  
P92 14.00 usec  
PL92 12.00000000 W  
SFO93 400.1324710 MHz  
P93 14.00 usec  
PL93 12.00000000 W  
SFO94 400.1324710 MHz  
P94 14.00 usec  
PL94 12.00000000 W  
SFO95 400.1324710 MHz  
P95 14.00 usec  
PL95 12.00000000 W  
SFO96 400.1324710 MHz  
P96 14.00 usec  
PL96 12.00000000 W  
SFO97 400.1324710 MHz  
P97 14.00 usec  
PL97 12.00000000 W  
SFO98 400.1324710 MHz  
P98 14.00 usec  
PL98 12.00000000 W  
SFO99 400.1324710 MHz  
P99 14.00 usec  
PL99 12.00000000 W  
SFO100 400.1324710 MHz  
P100 14.00 usec  
PL100 12.00000000 W

9.051  
8.324  
8.302  
8.299  
7.833  
7.812  
7.498  
7.477  
6.858  
6.834  
6.829

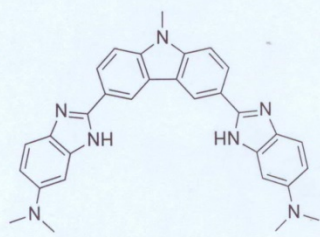

Supplement: c5ra11543d1.pdf [file c5ra11543d1.pdf]
